# Supplementary material for: Droplet Digital PCR Quantification of Selected Intracellular and Extracellular microRNAs Reveals Changes in Their Expression Pattern during Porcine In Vitro Adipogenesis
Source: MDPI journal article supplement (doi:10.3390/genes14030683), 2023-03-09
Supplement: s1 [file s1]

## **Supplementary Material**

**Droplet digital PCR quantification of selected intracellular and extracellular microRNAs reveals changes in their expression pattern during porcine in vitro adipogenesis**

Adrianna Bilinska, Marcin Pszczola, Monika Stachowiak, Joanna Stachecka, Franciszek Garbacz, Mehmet Onur Aksoy, Izabela Szczербal\*

**Table S1.** PCR primers used to study the expression level of adipocyte differentiation marker genes.

| Gene                | Primer sequence                                          | Product size (bp) | Annealing temperature (°C) | Genbank accession number |
|---------------------|----------------------------------------------------------|-------------------|----------------------------|--------------------------|
| <b><i>RPL27</i></b> | F: 5` GCAAAGCGGTCATCGTAAA<br>R: 5` CTTGTGGGCATGAGGTGAT   | 190               | 60                         | NM_001097479.1           |
| <b><i>PPARG</i></b> | F: 5` GCATCAGCTCTGTGGACCTG<br>R: 5` GATCAGCTCTCGGGAATGGG | 132               | 60                         | XM_005669783             |
| <b><i>CEBPA</i></b> | F: 5` CGTGAGCGCAACAACATCG<br>R: 5` CTCAGTTGTTCCACCCGCTT  | 131               | 60                         | NC_010448                |
| <b><i>FABP4</i></b> | F: 5` TTCAAATTGGGCCAGGAAT<br>R: 5` ATTCTGGTAGCCGTGACACC  | 191               | 60                         | NM_001002817             |

**Table S2.** Expression levels of miRNAs in cell culture medium supplemented with 10% of fetal bovine serum (FBS). SE – standard error.

| miRNA    | Expression | SE   |
|----------|------------|------|
| miR-21a  | 6.3        | 0.52 |
| miR-92a  | 0          |      |
| miR-146a | 0          |      |
| miR-383  | 0.8        | 0.72 |
| miR-26b  | 0          |      |
| miR-30a  | 6.7        | 0.32 |
| miR-148a | 3.7        | 0.15 |
| miR-199a | 4.5        | 0.65 |

**Table S3.** Lipid droplet content and relative gene expression of *CEBPA*, *FABP4*, and *PPARG* genes across the consecutive days of the experiment (supplementary to Figure 2). The regression slope and p-values were obtained using the Locally Weighted Scatterplot Smoothing method of the ggplot2 package.

|                    | Regression slope | Pr(> t )     |
|--------------------|------------------|--------------|
| Lipid accumulation | 0.0137           | 0.000196 *** |
| <i>CEBPA</i>       | 0.03713          | 0.00357 **   |
| <i>FABP4</i>       | 7.866            | 0.000811 *** |
| <i>PPARG</i>       | 1.8170           | 0.0114 *     |

**Table S4.** Expression levels of intracellular miRNAs over the course of differentiation. The comparisons were made between days of the experiment for one miRNA at a time, so the table should be read column-wise. The same letters indicate the absence of a significant difference (at the 0.05 level) between the expression levels. SE – standard error.

| Day | miR-21a                |           | miR-92a                |           | miR-146a            |        | miR-383             |       |
|-----|------------------------|-----------|------------------------|-----------|---------------------|--------|---------------------|-------|
|     | Expression             | SE        | Expression             | SE        | Expression          | SE     | Expression          | SE    |
| 0   | 311037.7 <sup>a</sup>  | 177776.1  | 130753.22 <sup>a</sup> | 229397.56 | 220.89 <sup>a</sup> | 113.24 | 93.27 <sup>ab</sup> | 17.86 |
| 2   | 499733.5 <sup>a</sup>  | 285626.8  | 122560.23 <sup>a</sup> | 215023.52 | 393.23 <sup>a</sup> | 201.59 | 47.07 <sup>a</sup>  | 9.01  |
| 4   | 978506.8 <sup>a</sup>  | 559273.6  | 2103.51 <sup>a</sup>   | 3690.46   | 776.39 <sup>a</sup> | 398.02 | 57.78 <sup>a</sup>  | 11.06 |
| 6   | 1650918.4 <sup>a</sup> | 943595.9  | 2146.12 <sup>a</sup>   | 3765.23   | 118.54 <sup>a</sup> | 60.77  | 70.32 <sup>ab</sup> | 13.47 |
| 8   | 2292898.0 <sup>a</sup> | 1310524.6 | 358279.79 <sup>a</sup> | 628577.32 | 417.17 <sup>a</sup> | 213.86 | 40.94 <sup>a</sup>  | 9.84  |
| 10  | 2140759.0 <sup>a</sup> | 1223568.3 | 514323.56 <sup>a</sup> | 902345.41 | 594.95 <sup>a</sup> | 305.00 | 138.79 <sup>b</sup> | 26.58 |

| Day | miR-26b                 |          | miR-30a                  |          | miR-148a                |          | miR-199a               |          |
|-----|-------------------------|----------|--------------------------|----------|-------------------------|----------|------------------------|----------|
|     | Expression              | SE       | Expression               | SE       | Expression              | SE       | Expression             | SE       |
| 0   | 192918.2 <sup>a</sup>   | 29326.41 | 53663.74 <sup>a</sup>    | 9214.89  | 92806.22 <sup>a</sup>   | 13351.41 | 601516.2 <sup>a</sup>  | 112036.2 |
| 2   | 215100.0 <sup>ab</sup>  | 32698.37 | 68626.90 <sup>a</sup>    | 11784.29 | 113618.63 <sup>a</sup>  | 16345.55 | 615991.2 <sup>a</sup>  | 114732.2 |
| 4   | 223008.3 <sup>abc</sup> | 33900.55 | 91439.51 <sup>ab</sup>   | 15701.56 | 220009.13 <sup>b</sup>  | 31651.24 | 1399203.5 <sup>a</sup> | 260610.4 |
| 6   | 435505.0 <sup>c</sup>   | 66203.18 | 160463.79 <sup>bc</sup>  | 27554.09 | 391520.87 <sup>bc</sup> | 56325.49 | 1260419.3 <sup>a</sup> | 234761.0 |
| 8   | 295933.1 <sup>abc</sup> | 44986.19 | 115999.72 <sup>abc</sup> | 19918.93 | 258042.60 <sup>b</sup>  | 37122.86 | 557527.0 <sup>a</sup>  | 103842.9 |
| 10  | 420999.7 <sup>bc</sup>  | 63998.16 | 239270.14 <sup>c</sup>   | 41086.34 | 614577.00 <sup>c</sup>  | 88415.08 | 1040886.7 <sup>a</sup> | 193871.7 |

**Table S5.** Expression levels of extracellular miRNAs over the course of differentiation. The comparisons were made between days of the experiment for one miRNA at the time, so the table should be read column-wise. The same letters indicate the absence of significant difference (at the 0.05 level) between the expression levels. SE – standard error.

| Day | miR-21a              |         | miR-92a               |          | miR-146a            |        | miR-383            |       |
|-----|----------------------|---------|-----------------------|----------|---------------------|--------|--------------------|-------|
|     | Expression           | SE      | Expression            | SE       | Expression          | SE     | Expression         | SE    |
| 0   | 2068.59 <sup>a</sup> | 1408.35 | 19085.39 <sup>a</sup> | 12068.23 | 261.59 <sup>b</sup> | 144.19 | 69.02 <sup>a</sup> | 17.76 |
| 2   | 277.89 <sup>a</sup>  | 189.19  | 1930.39 <sup>a</sup>  | 1220.64  | 32.21 <sup>a</sup>  | 16.47  | 64.67 <sup>a</sup> | 16.64 |
| 4   | 340.91 <sup>a</sup>  | 232.10  | 2275.61 <sup>a</sup>  | 1438.93  | 21.37 <sup>a</sup>  | 10.93  | 51.05 <sup>a</sup> | 13.13 |
| 6   | 3418.55 <sup>a</sup> | 2327.43 | 22065.47 <sup>a</sup> | 13952.62 | 27.69 <sup>a</sup>  | 14.16  | 56.61 <sup>a</sup> | 14.56 |
| 8   | 1122.88 <sup>a</sup> | 764.48  | 9807.34 <sup>a</sup>  | 6201.45  | 25.43 <sup>a</sup>  | 13.01  | 54.60 <sup>a</sup> | 14.05 |
| 10  | 5622.02 <sup>a</sup> | 4435.01 | 3913.78 <sup>a</sup>  | 2474.79  | 19.96 <sup>a</sup>  | 10.21  | 91.31 <sup>a</sup> | 23.49 |

| Day | miR-26b             |       | miR-30a              |        | miR-148a             |        | miR-199a             |        |
|-----|---------------------|-------|----------------------|--------|----------------------|--------|----------------------|--------|
|     | Expression          | SE    | Expression           | SE     | Expression           | SE     | Expression           | SE     |
| 0   | 227.02 <sup>b</sup> | 28.77 | 1539.17 <sup>b</sup> | 536.14 | 224.83 <sup>b</sup>  | 38.80  | 1081.60 <sup>b</sup> | 174.82 |
| 2   | 73.28 <sup>a</sup>  | 9.29  | 46.95 <sup>a</sup>   | 16.35  | 77.35 <sup>a</sup>   | 13.35  | 453.26 <sup>a</sup>  | 73.26  |
| 4   | 200.36 <sup>b</sup> | 25.39 | 577.99 <sup>b</sup>  | 201.33 | 625.33 <sup>cd</sup> | 107.90 | 1269.71 <sup>b</sup> | 205.23 |
| 6   | 480.22 <sup>c</sup> | 60.86 | 2038.63 <sup>b</sup> | 710.12 | 1201.94 <sup>d</sup> | 207.40 | 2747.86 <sup>c</sup> | 444.14 |
| 8   | 162.93 <sup>b</sup> | 20.65 | 965.36 <sup>b</sup>  | 336.27 | 485.03 <sup>bc</sup> | 83.69  | 1091.88 <sup>b</sup> | 176.48 |
| 10  | 234.52 <sup>b</sup> | 29.72 | 436.89 <sup>b</sup>  | 152.18 | 693.66 <sup>cd</sup> | 119.69 | 1249.69 <sup>b</sup> | 201.99 |

**Table S6.** Expression levels of intracellular and extracellular miRNAs. The comparisons were made between miRNAs, so the table should be read across the lines. The same letters indicate the absence of significant difference (at the 0.05 level) between the expression levels. SE – standard error.

|          | <b>Cells</b>         |           | <b>Medium</b>     |           |
|----------|----------------------|-----------|-------------------|-----------|
|          | <b>Expression</b>    | <b>SE</b> | <b>Expression</b> | <b>SE</b> |
| miR-21a  | 1511082 <sup>a</sup> | 772269    | 1253 <sup>b</sup> | 470       |
| miR-92a  | 48694 <sup>a</sup>   | 30015     | 6435 <sup>b</sup> | 3967      |
| miR-146a | 354 <sup>a</sup>     | 91.71     | 35 <sup>b</sup>   | 9.25      |
| miR-383  | 69 <sup>a</sup>      | 5.79      | 63.3 <sup>a</sup> | 6.61      |
| miR-26b  | 281925 <sup>a</sup>  | 20403.1   | 198 <sup>b</sup>  | 14.4      |
| miR-30a  | 106989 <sup>a</sup>  | 18434     | 574 <sup>b</sup>  | 99        |
| miR-148a | 228954 <sup>a</sup>  | 19481.4   | 405 <sup>b</sup>  | 34.4      |
| miR-199a | 927893 <sup>a</sup>  | 130155    | 1152 <sup>b</sup> | 116       |

**Table S7.** Relationship between the expression in the medium and cells based on regression slopes for the log-transformed expression in the medium on the log-transformed expression in cells for different miRNA.

|          | <b>Estimate</b> | <b>P-value</b> |
|----------|-----------------|----------------|
| miR-21a  | -0.40           | 0.17           |
| miR-92a  | -0.84           | 0.21           |
| miR-146a | -0.33           | 0.18           |
| miR-383  | 0.33            | 0.05           |
| miR-26b  | -0.12           | 0.68           |
| miR-30a  | -0.02           | 0.87           |
| miR-148a | 0.12            | 0.54           |
| miR-199a | -0.25           | 0.41           |
